# Supplementary material for: Structural reorganization of SHP2 by oncogenic mutations and implications for oncoprotein resistance to allosteric inhibition
Source: PubMed Central journal article supplement (PMC6207684; doi:10.1038/s41467-018-06823-9), 2018-10-30
Supplement: 41467_2018_6823_MOESM1_ESM.pdf [file 41467_2018_6823_MOESM1_ESM.pdf]

**Structural reorganization of SHP2 by oncogenic mutations and implications for oncoprotein resistance to allosteric inhibition**

J.R. LaRochelle et al. 2018

Supplementary Information

## SHP099 Dose Response of SHP2 E76K

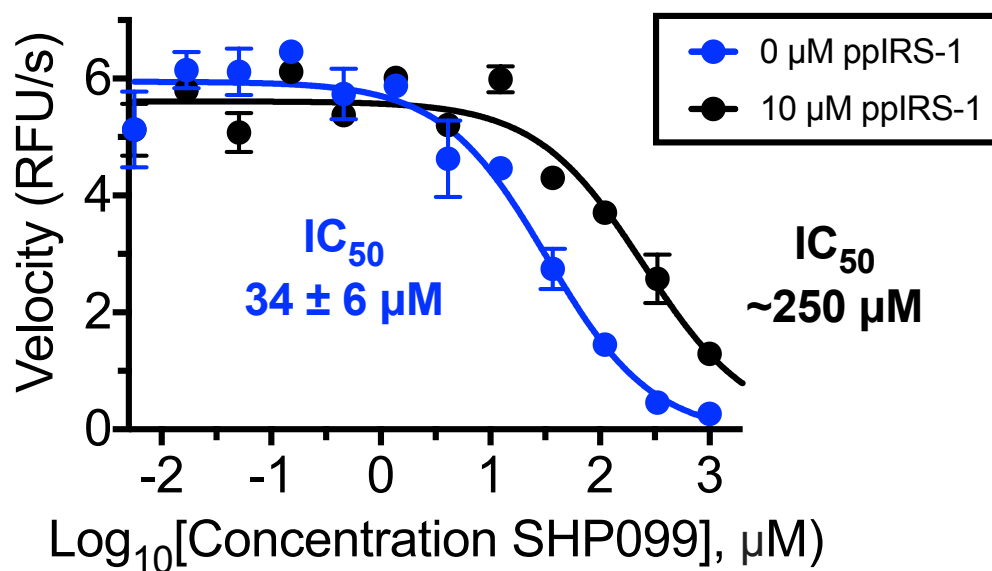

**Supplementary Fig. 1.** Sensitivity of E76K to inhibition by SHP099 in the absence and presence of phospho-IRS-1. Error bars represent standard error of the mean (SEM) and were calculated using GraphPad Prism.

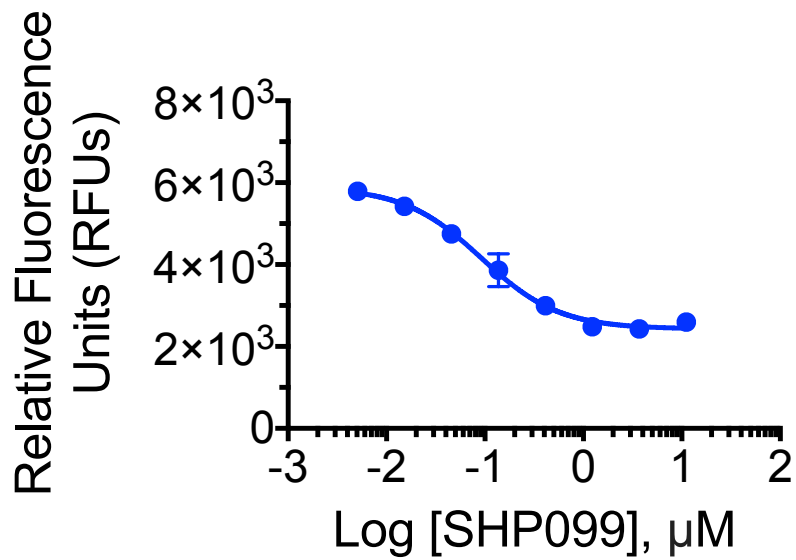

**Supplementary Fig. 2.** Inhibition of SHP2WT by SHP099 in the presence of 2 nM p-IRS1 bisphosphopeptide. Error bars represent standard error of the mean (SEM) and were calculated using GraphPad Prism.

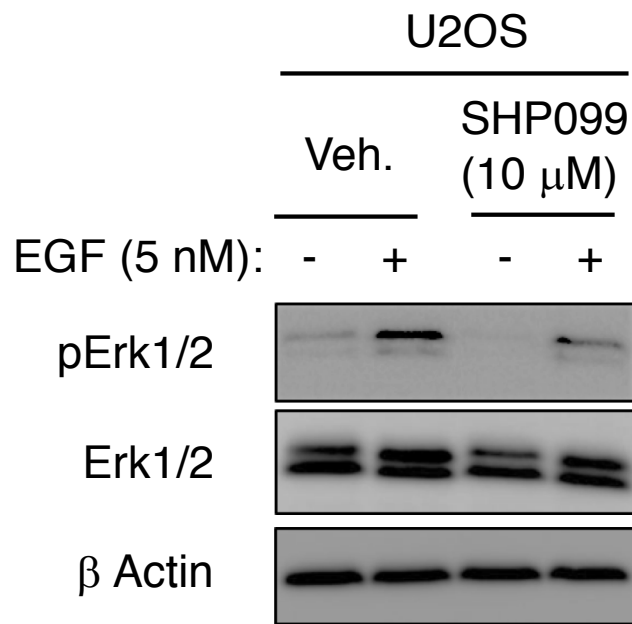

**Supplementary Fig. 3.** U2OS cells were serum starved for 48 hours, treated with SHP099 or vehicle control for 2 hours, and then stimulated with EGF. Cells were lysed on ice 10 min after stimulation, and pErk levels were analyzed by western blot.

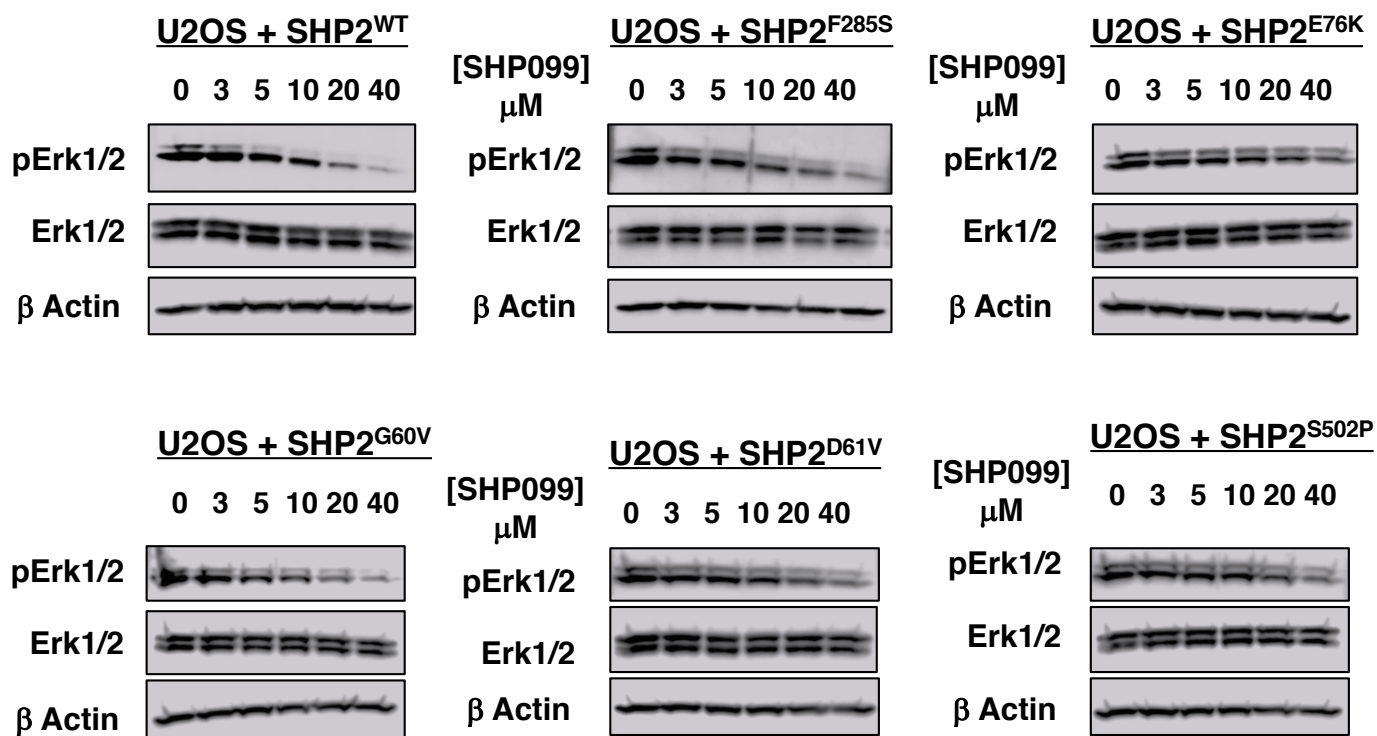

**Supplementary Fig. 4.**  $2.5 \times 10^5$  U2OS cells were seeded, transfected with various oncogenic forms of SHP2, and treated with SHP099 for 2 hours. pErk levels were analyzed by western blot.

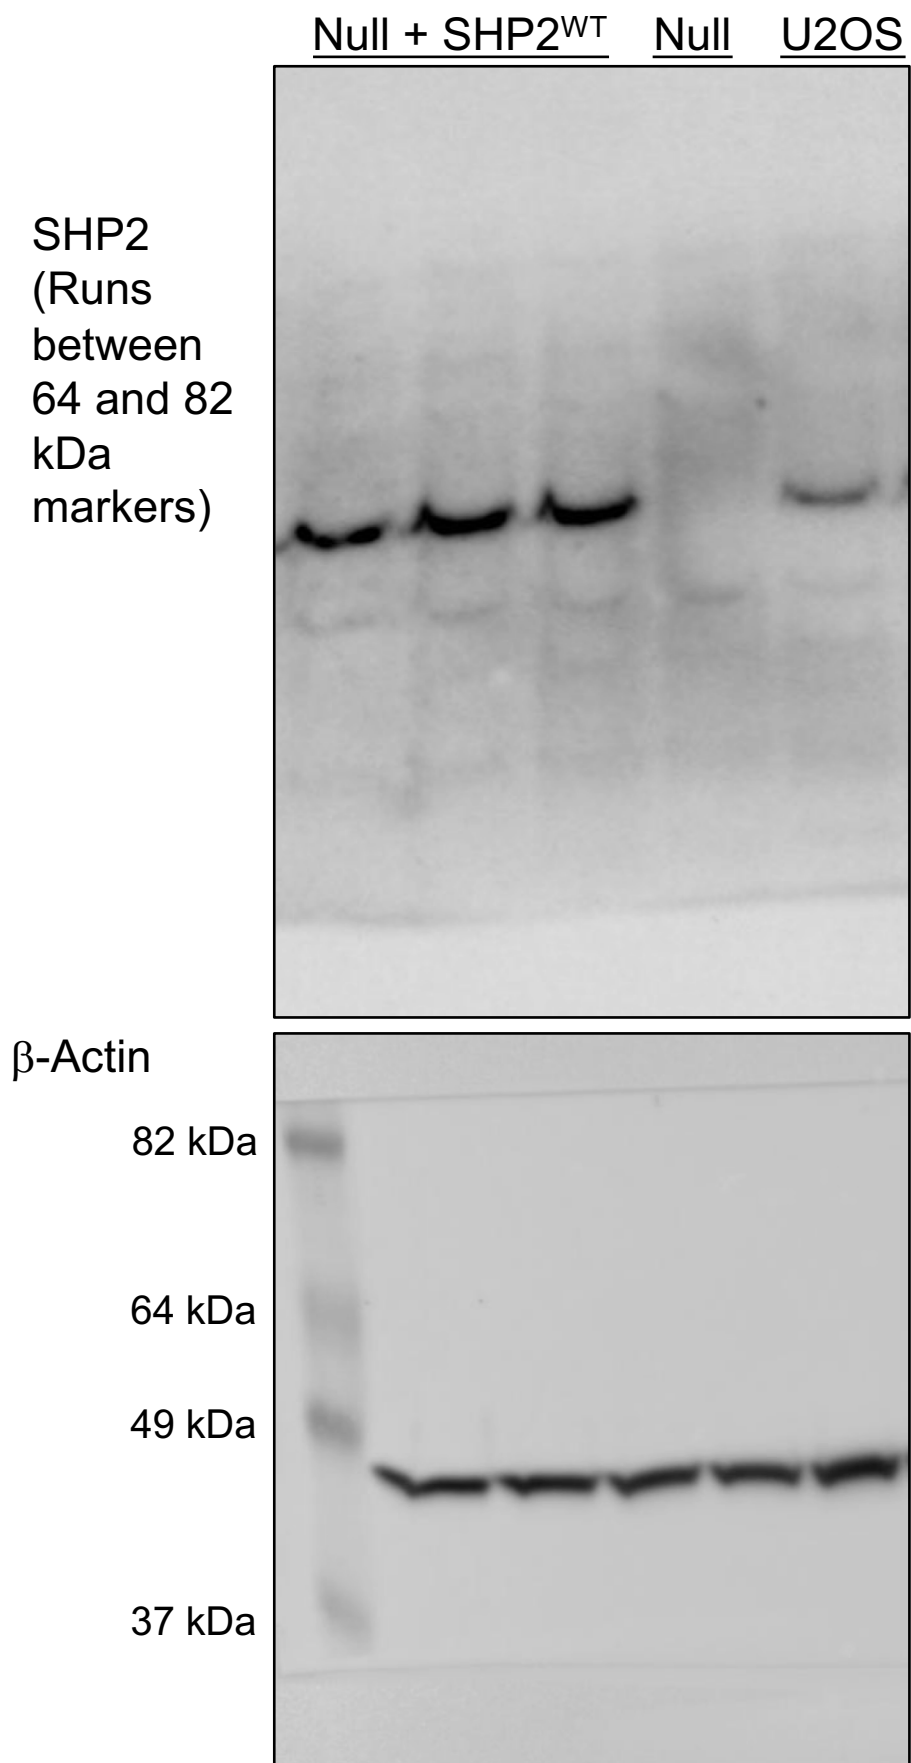

**Supplementary Fig. 5.** Uncropped lanes from western blots shown in Figure 5B.

U2OS<sup>Parental</sup> (ATCC® HTB-96™)

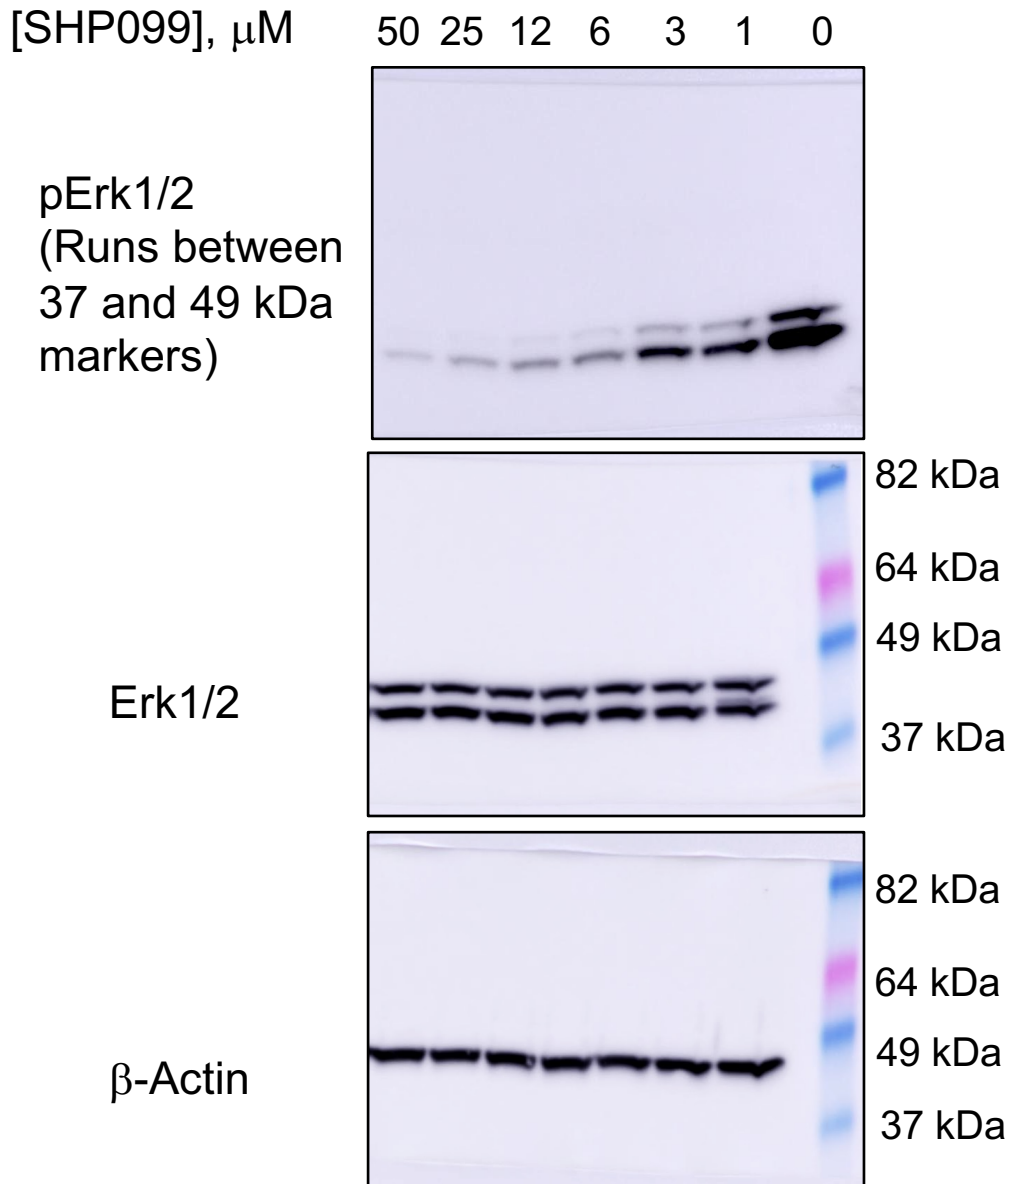

**Supplementary Fig. 6.** Uncropped lanes from western blots shown in Figure 5C.

U2OS<sup>PTPN11-Null</sup>

[SHP099],  $\mu\text{M}$  50 25 12 6 3 2 1 0.4 0

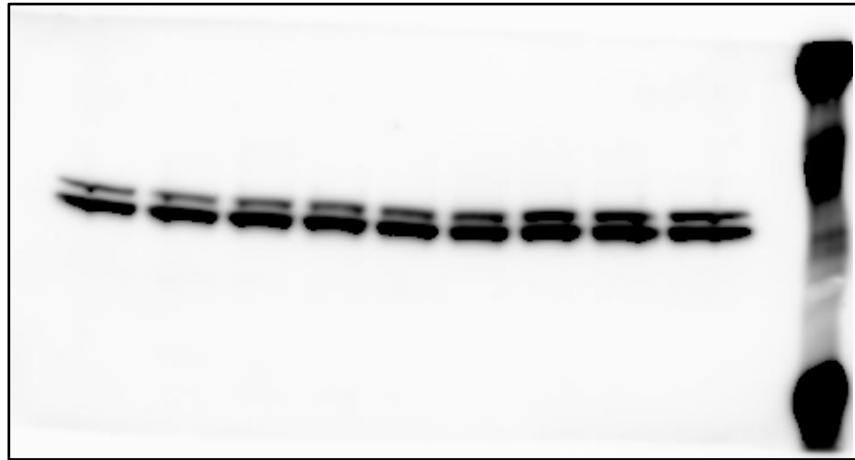

pErk1/2

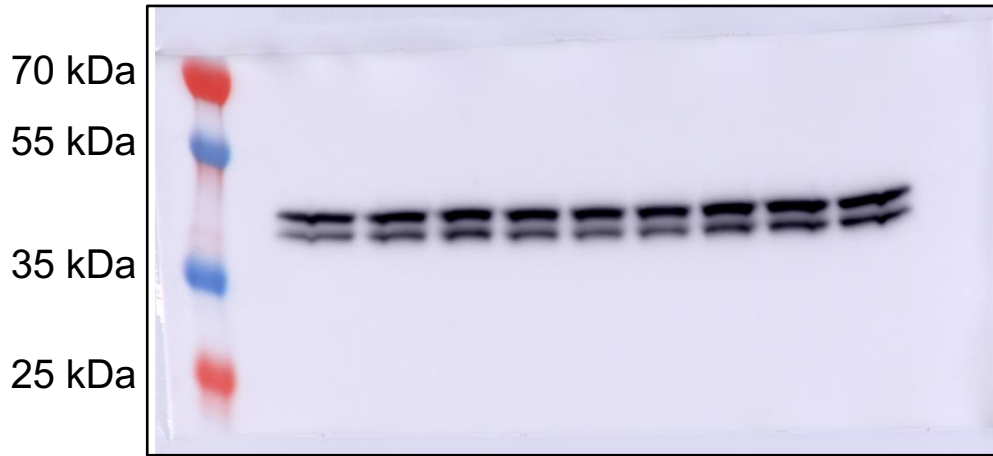

Erk1/2

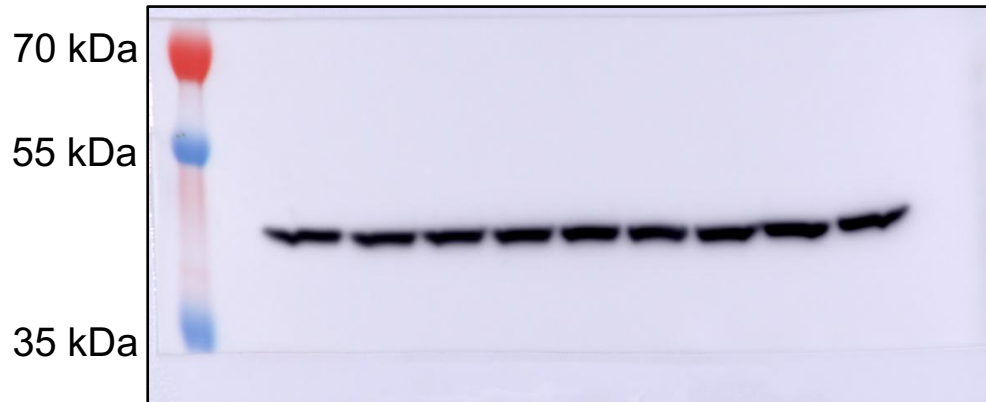

$\beta$ -Actin

**Supplementary Fig. 7.** Uncropped lanes from western blots shown in Figure 5D.



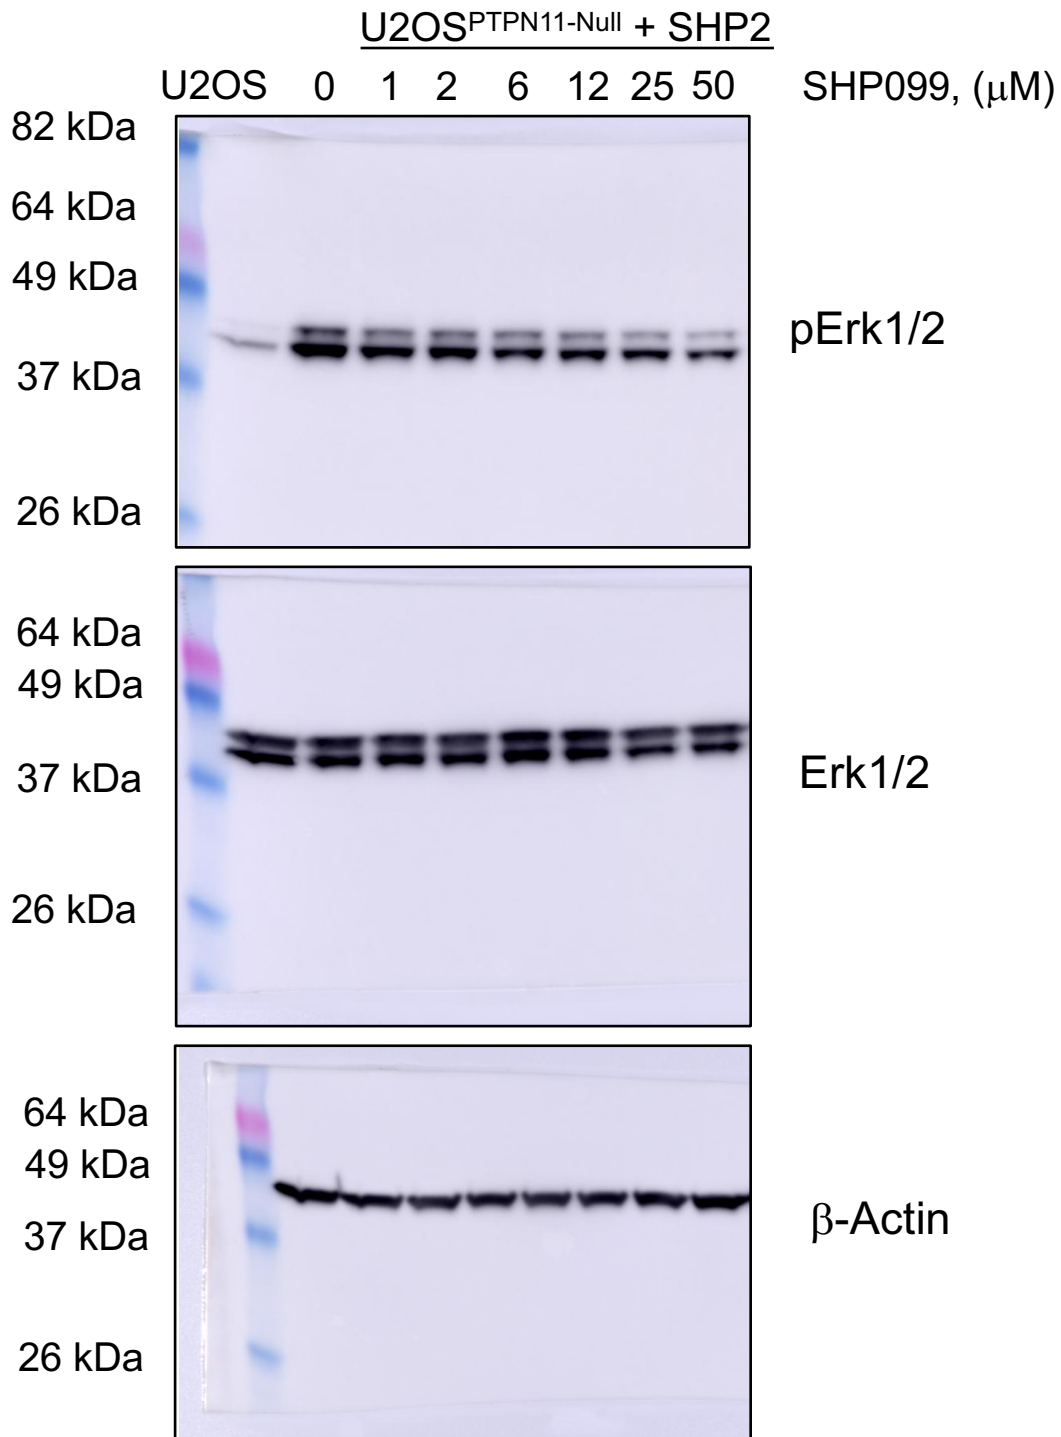

**Supplementary Fig. 8.** Uncropped lanes from western blots shown in Figure 5E.

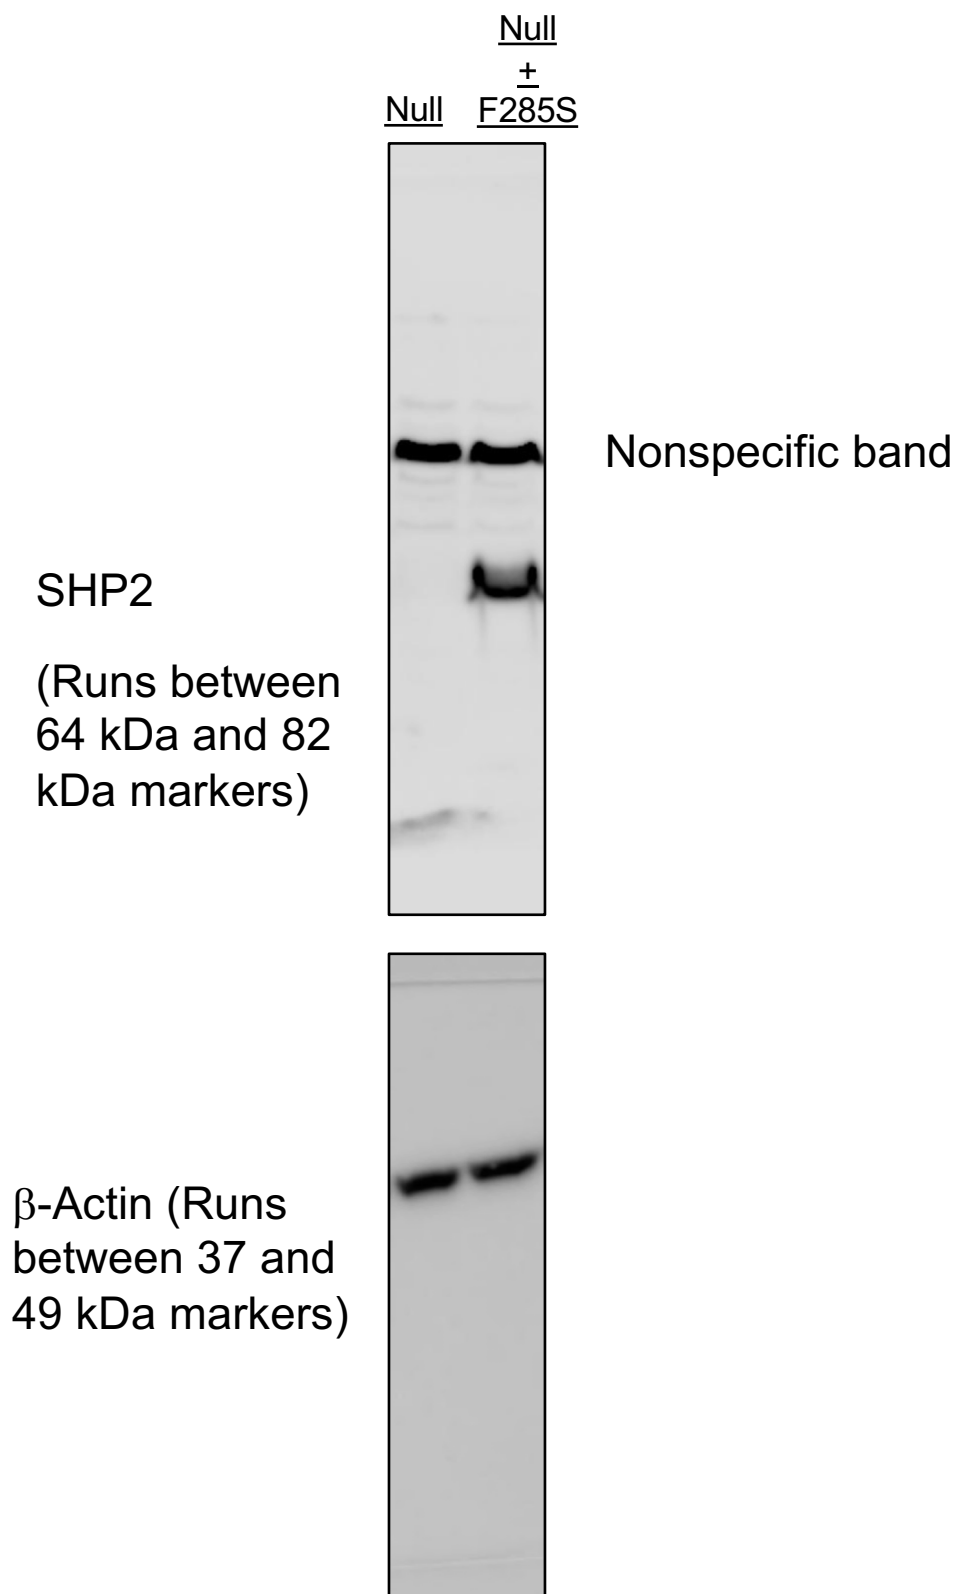

**Supplementary Fig. 9.** Uncropped lanes from western blots shown in Figure 6A.

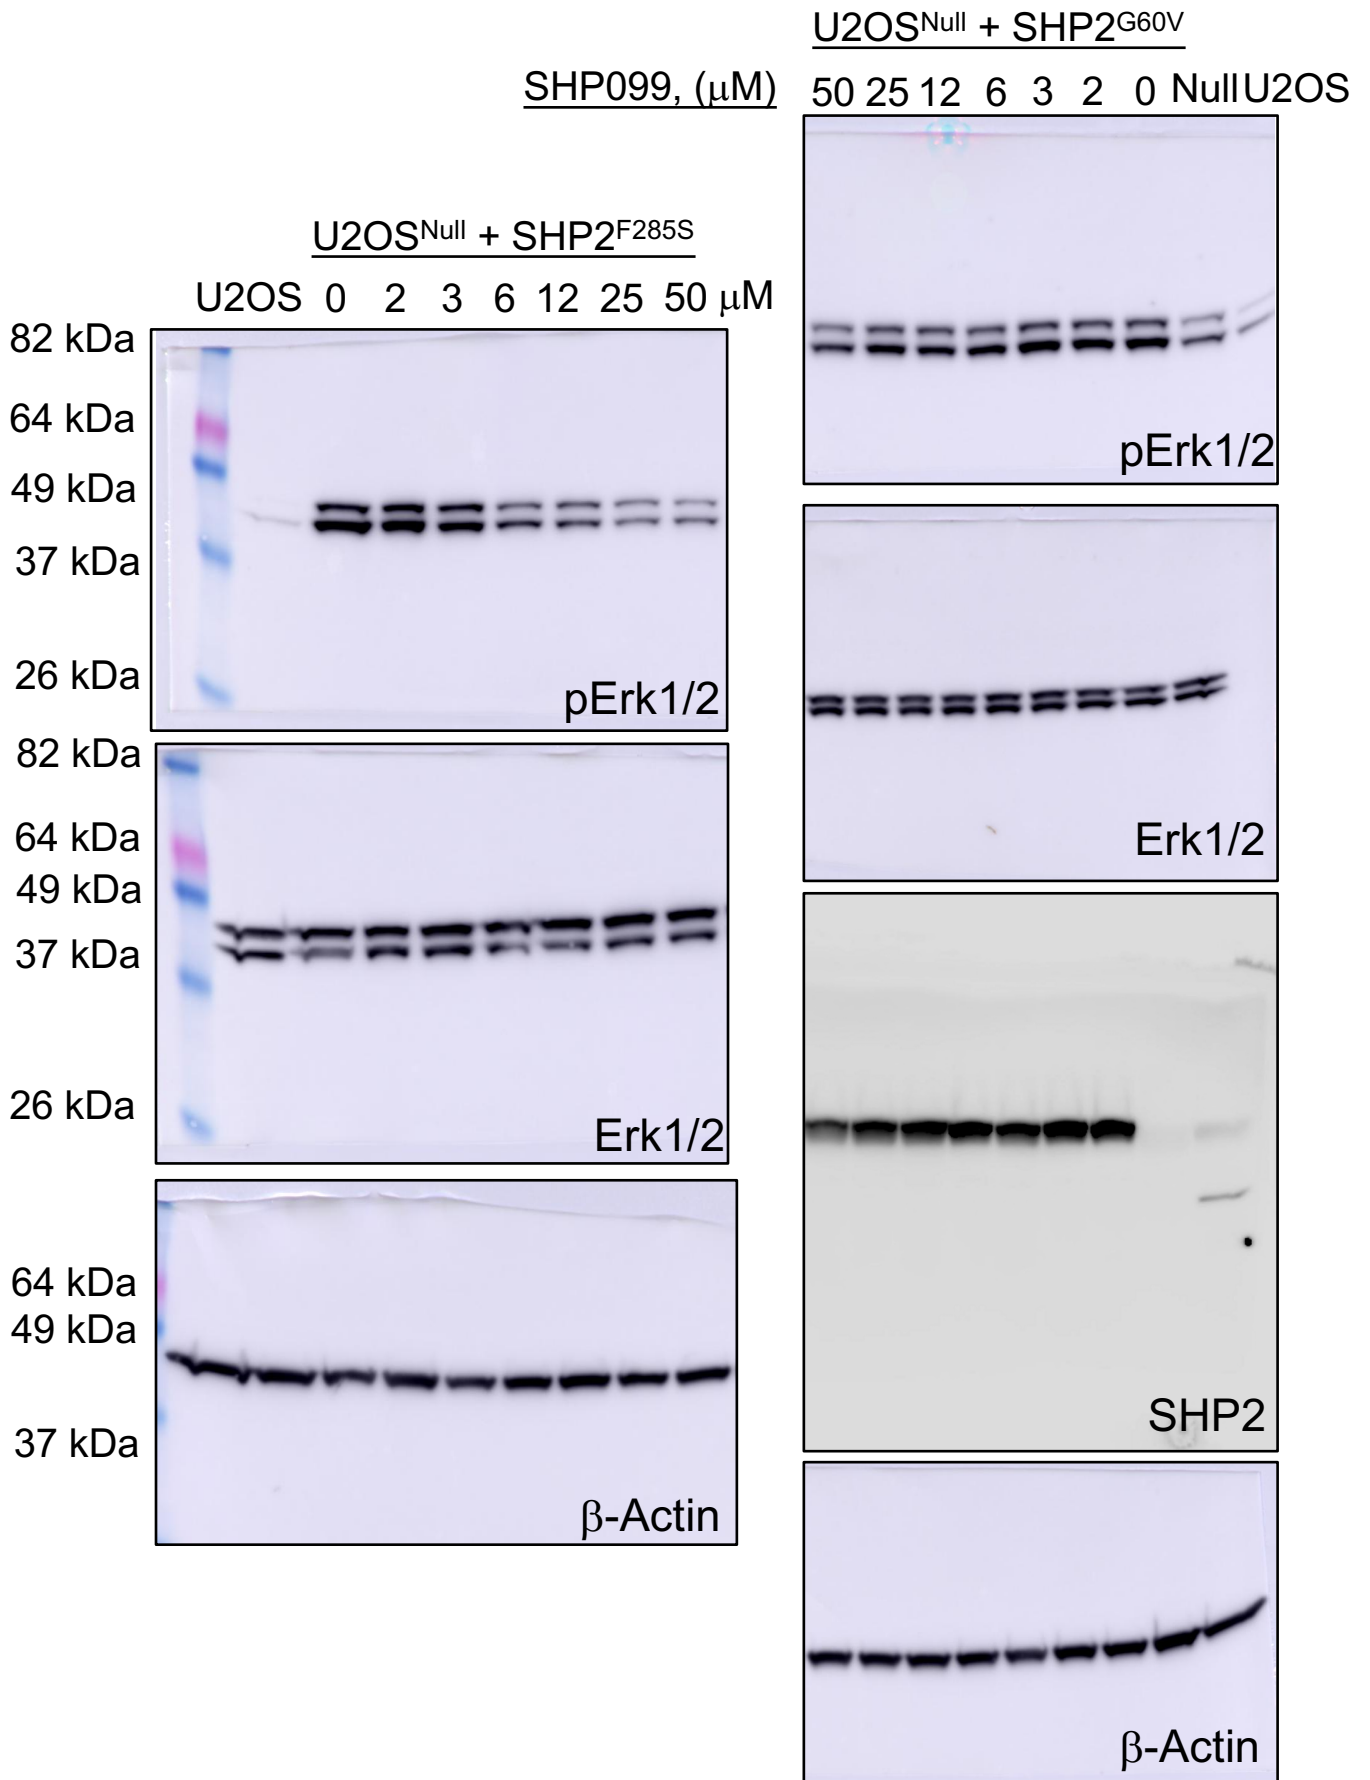

**Supplementary Fig. 10.** Uncropped lanes from western blots shown in Figure 6A and 6C.

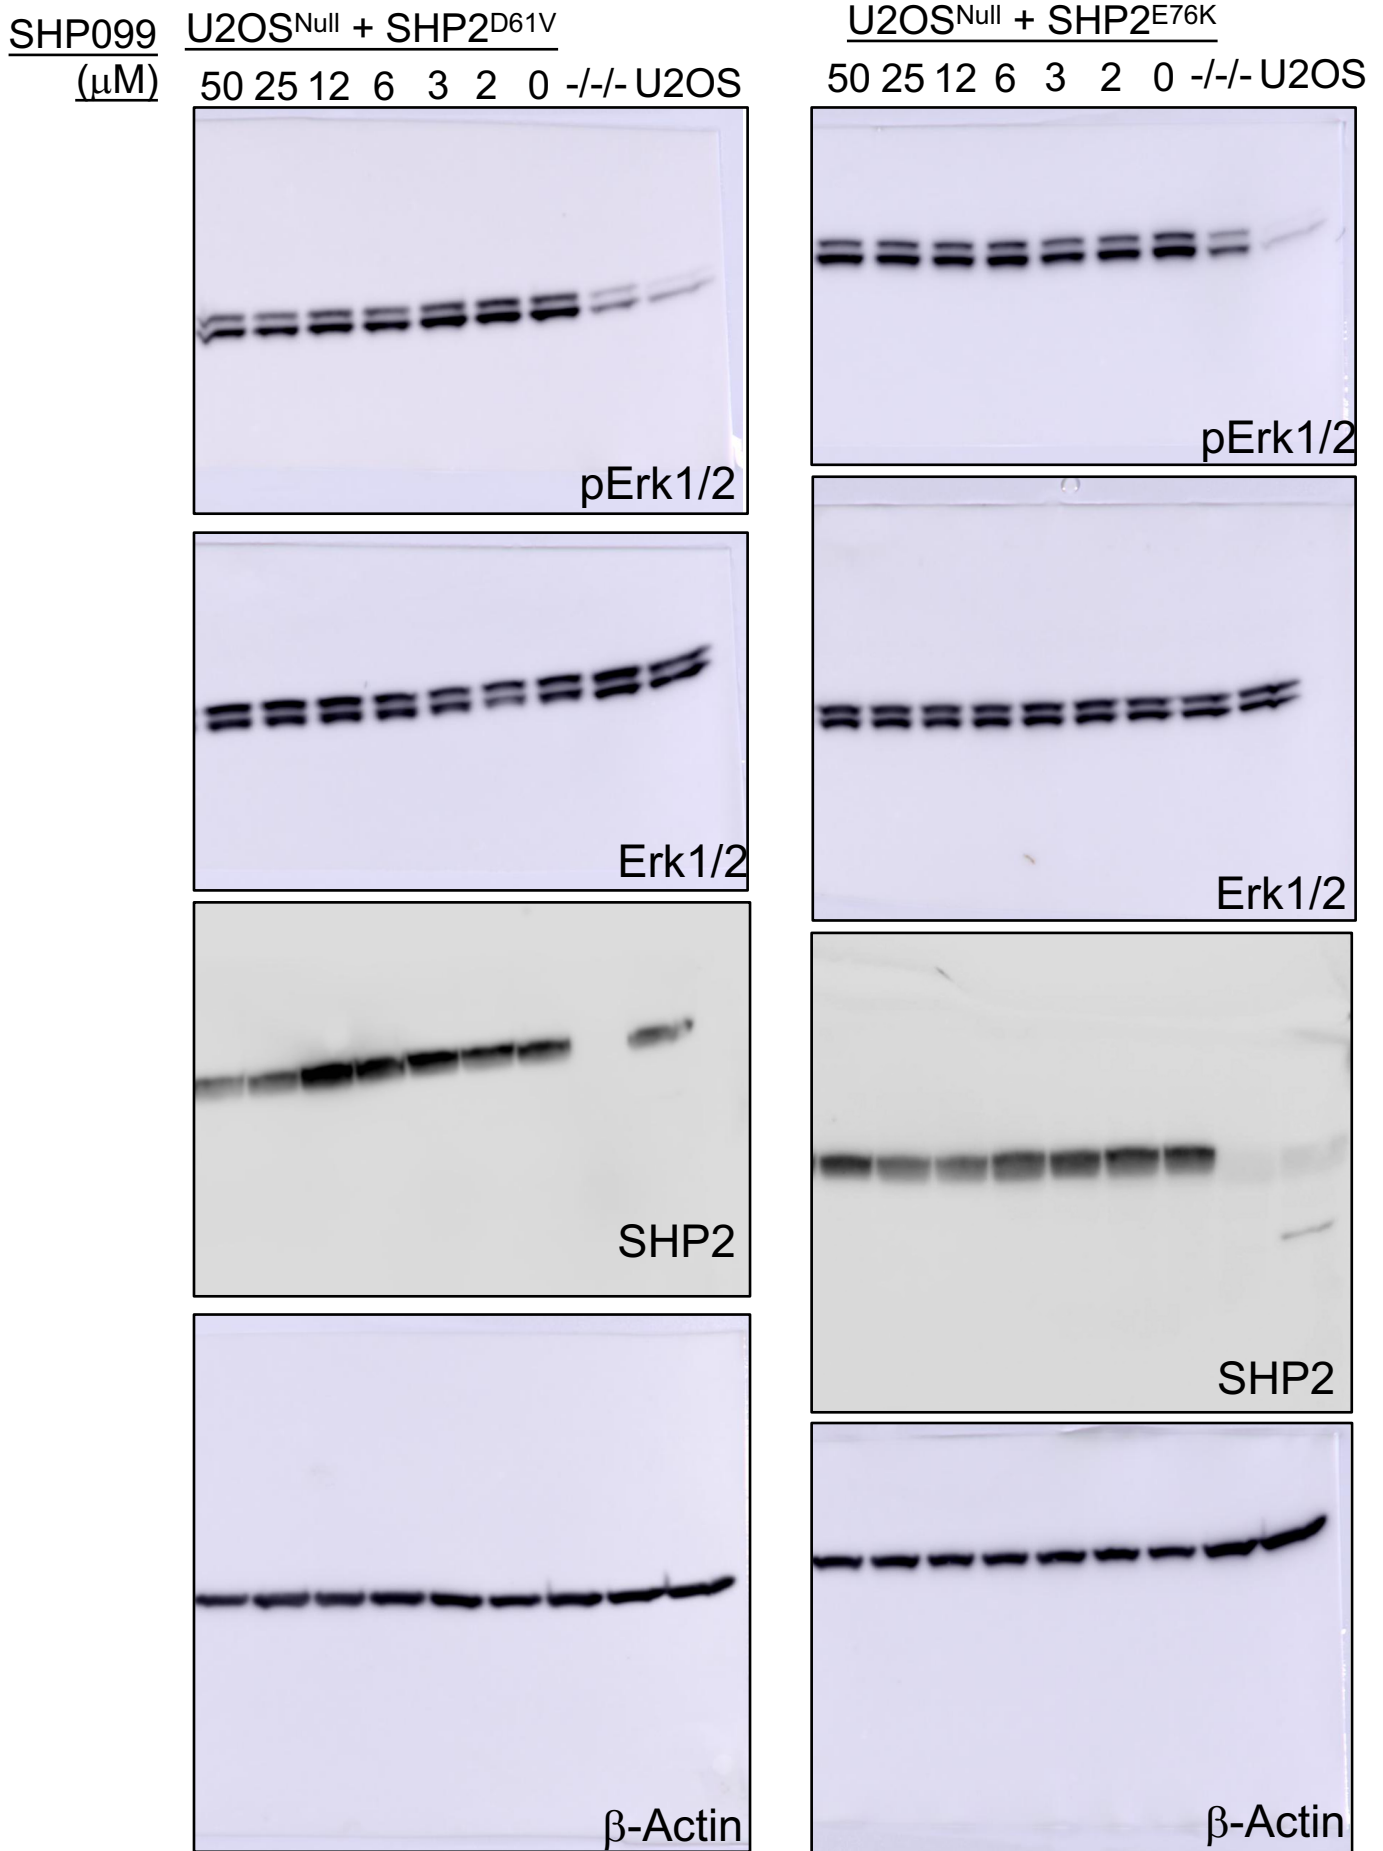

**Supplementary Fig. 11.** Uncropped lanes from western blots shown in Figure 6A and 6C.

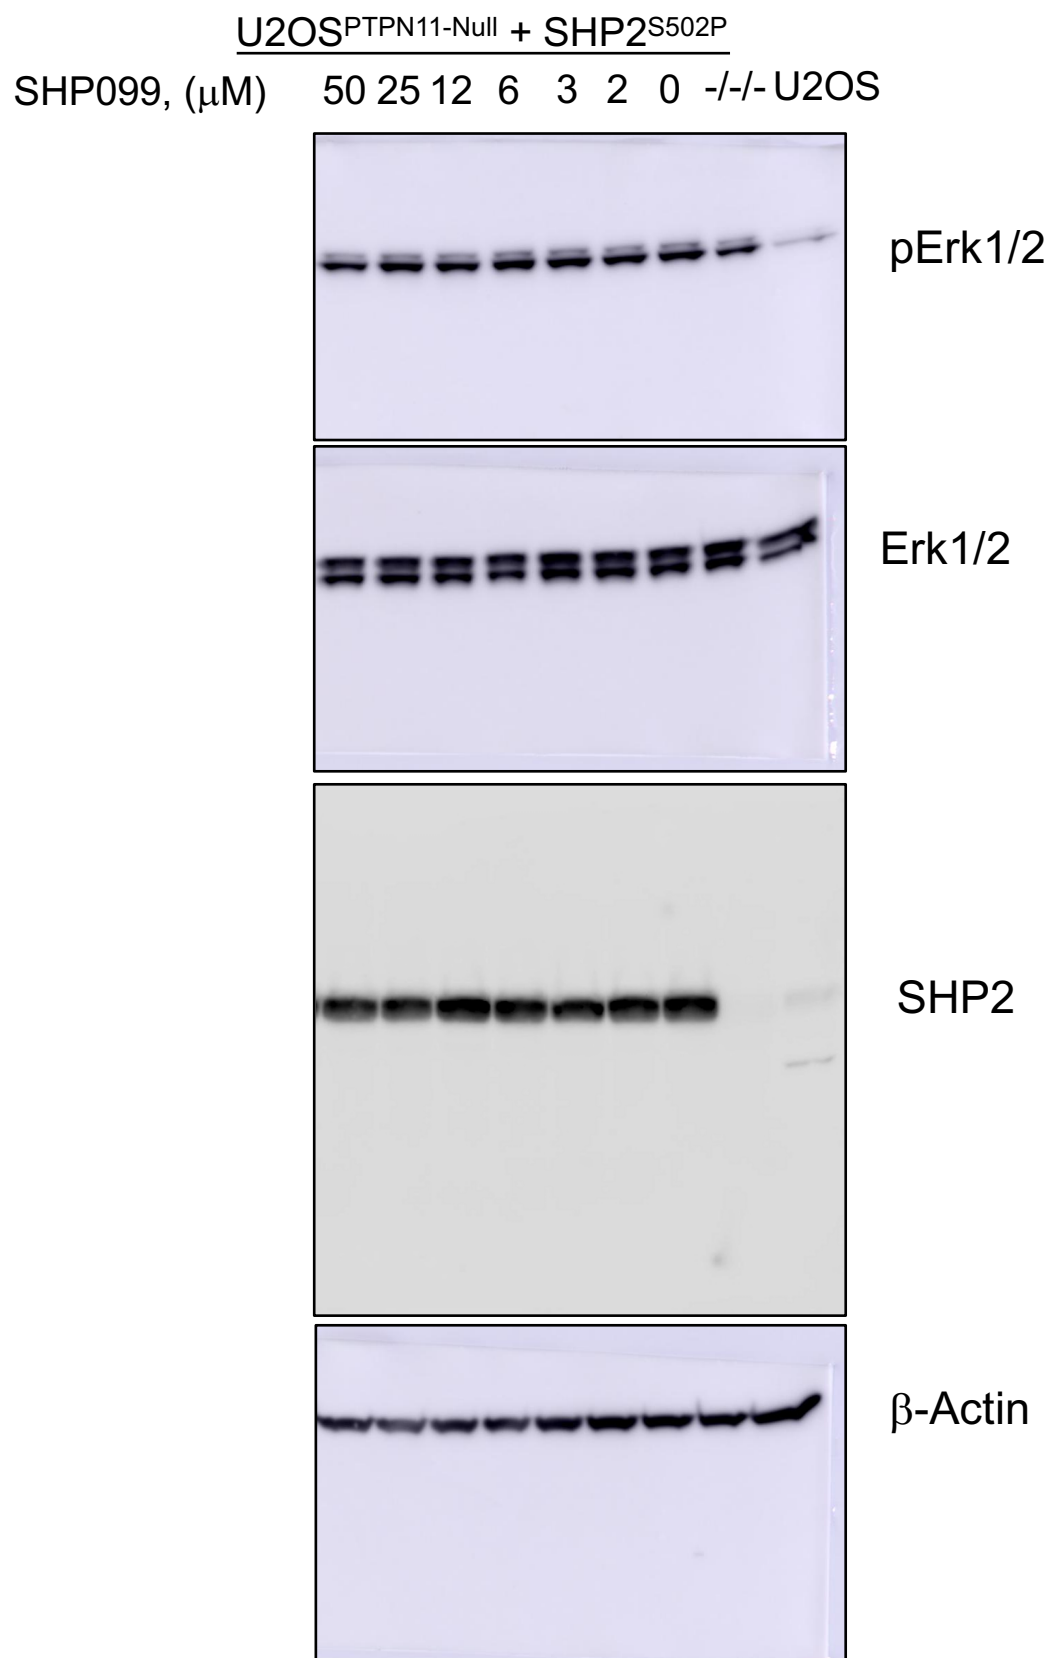

**Supplementary Fig. 12.** Uncropped lanes from western blots shown in Figure 6A and 6C.

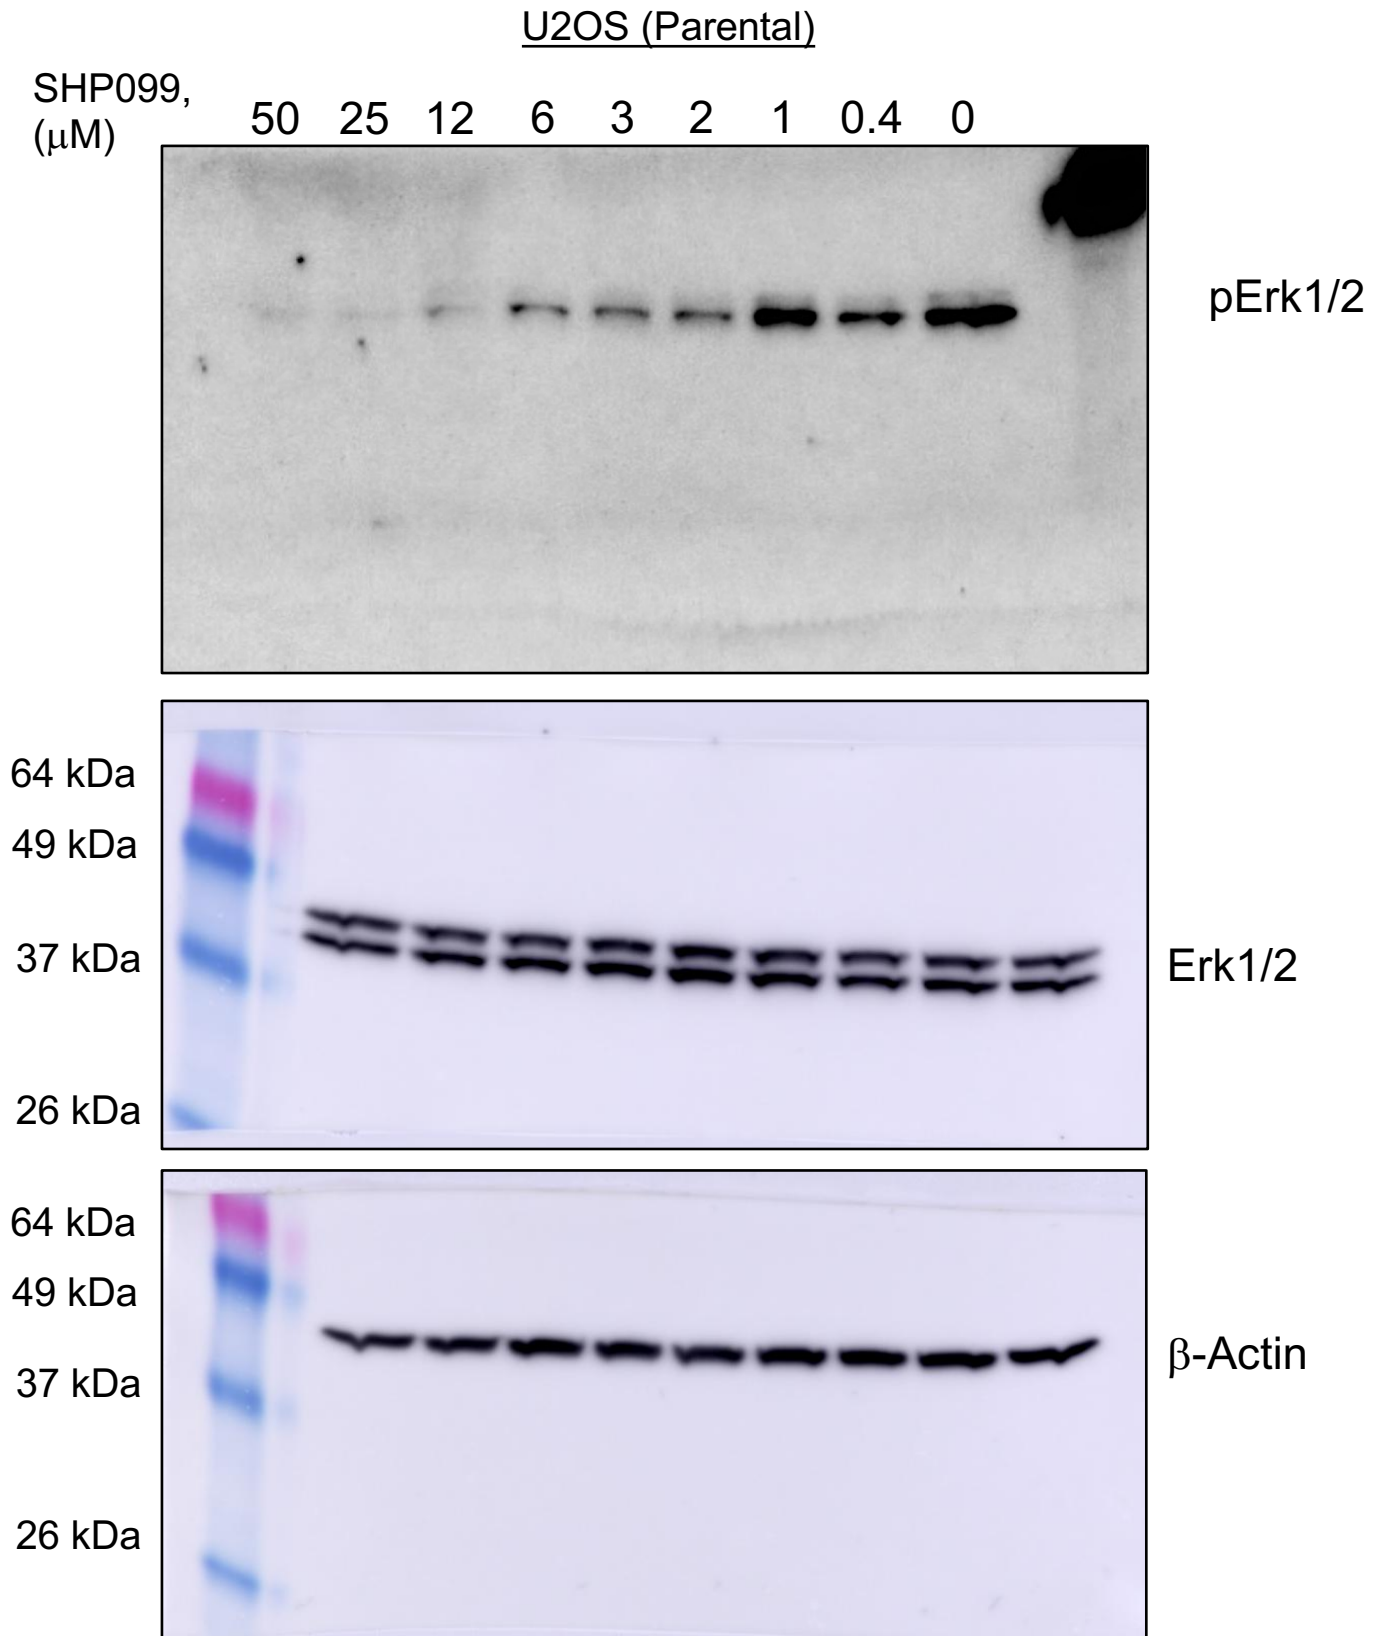

**Supplementary Fig. 13.** Uncropped lanes of extended SHP099 dose response in U2OS (parental) cells. Data is relevant to Figure 5F.

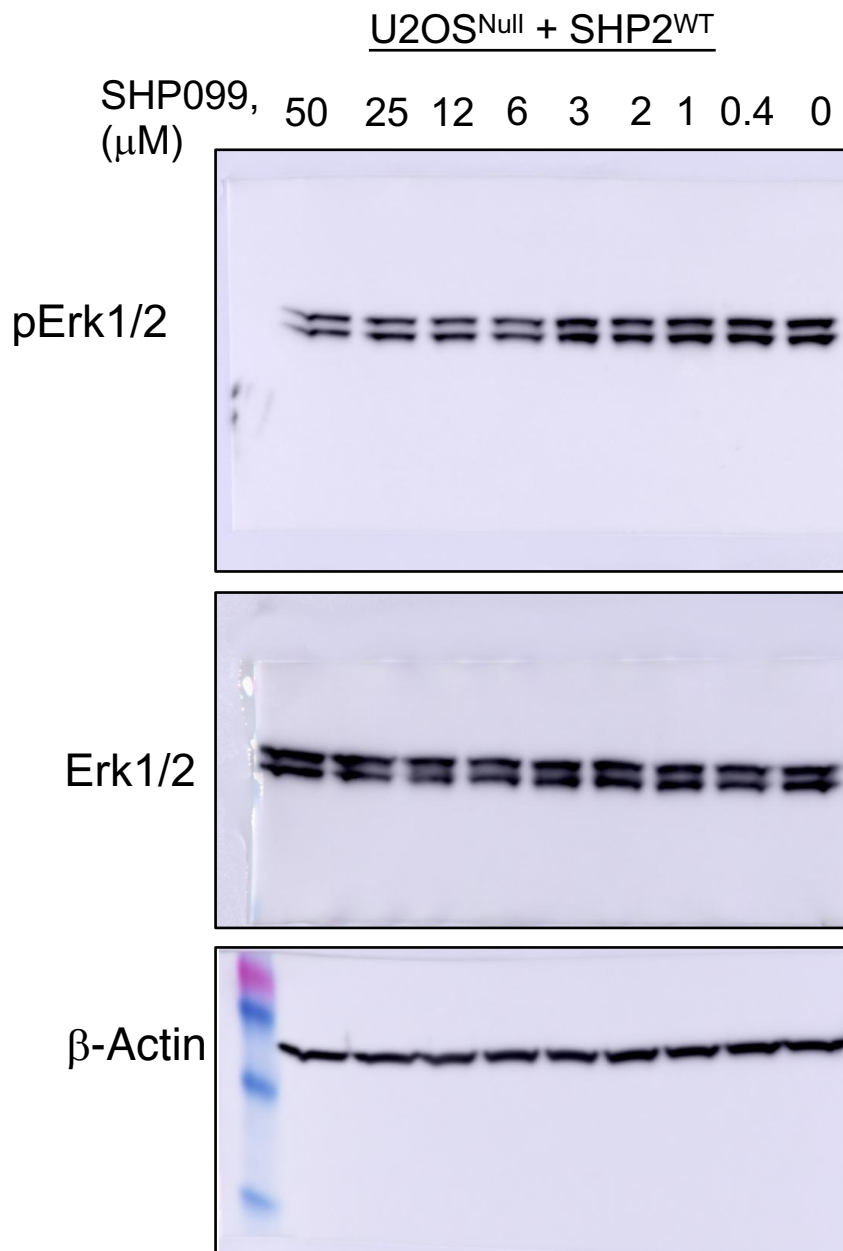

**Supplementary Fig. 14.** Uncropped lanes of extended SHP099 dose response in U2OS<sup>PTPN11-Null</sup> cells re-expressing SHP2 wild-type. Data is relevant to Figures 5F and 6D.

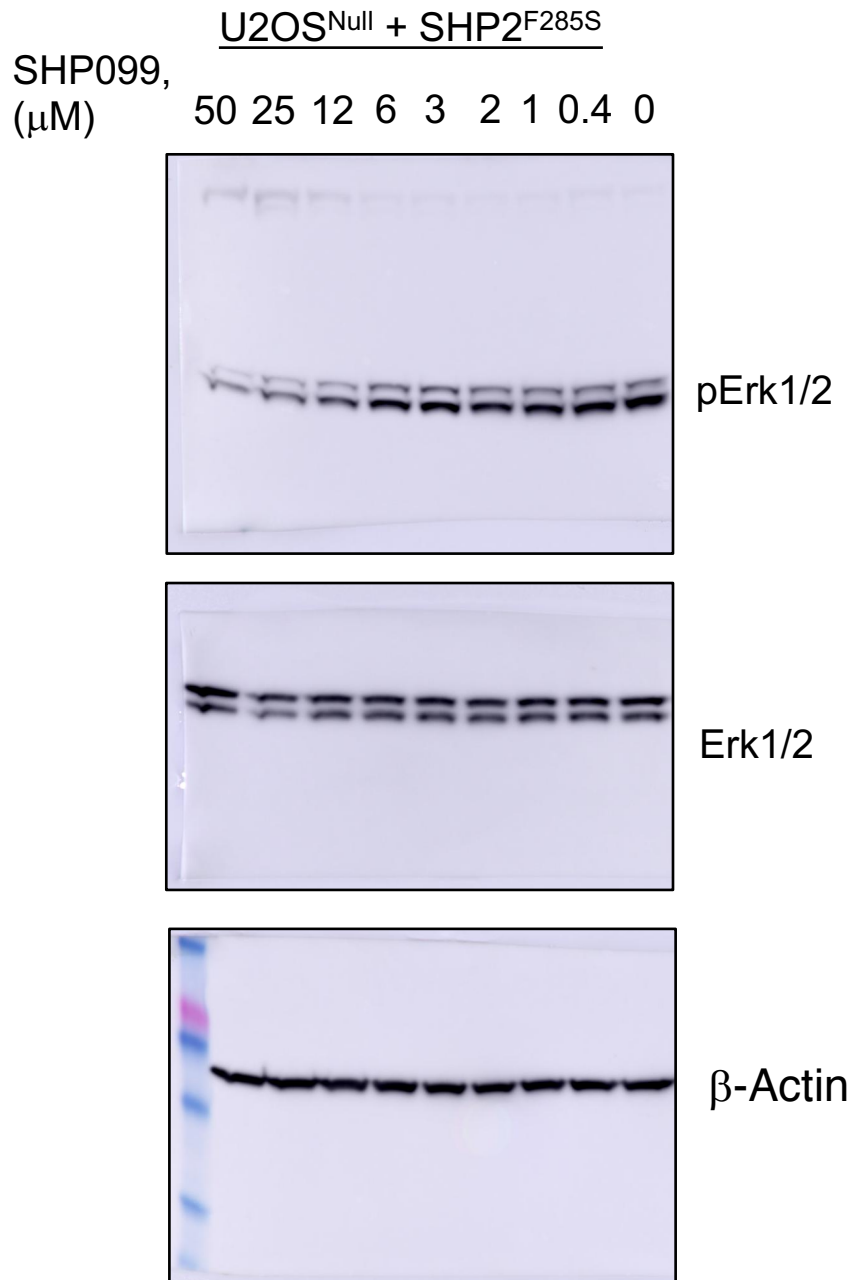

**Supplementary Fig. 15.** Uncropped lanes of extended SHP099 dose response in U2OS<sup>PTPN11-Null</sup> cells re-expressing SHP2<sup>F285S</sup>. Data is relevant to Figures 5F and 6D.



**Supplementary Table 1. Data collection, phasing, and refinement statistics**

| Parameters                                                       | SHP2 E76K                 | SHP2 E76K · SHP099 Complex |
|------------------------------------------------------------------|---------------------------|----------------------------|
| Space group                                                      | C2                        | P2 <sub>1</sub>            |
| Cell dimensions                                                  |                           |                            |
| <i>a</i> , <i>b</i> , <i>c</i> , Å                               | 249.1, 41.74, 153.9       | 45.44, 214.1, 55.5         |
| Resolution, Å                                                    | 124.8-2.62 (2.63-2.62)    | 107.0-2.75 (2.76-2.75)     |
| <i>R</i> <sub>merge</sub> <sup>a,b</sup>                         | 6.7 (63.8)                | 9.1 (60.0)                 |
| <i>I</i> / <i>σ</i> <sup>a</sup>                                 | 14.5 (2.2)                | 10.7 (2.1)                 |
| Completeness (%) <sup>a</sup>                                    | 99.8 (99.5)               | 99.6 (99.6)                |
| Multiplicity                                                     | 3.9 (4.0)                 | 3.4 (3.4)                  |
| Total Observations                                               | 153,455                   | 92,391                     |
| Unique reflections                                               | 39,327                    | 27,091                     |
| <i>R</i> <sub>work</sub> / <i>R</i> <sub>free</sub> <sup>c</sup> | 19.8 / 23.7 (21.6 / 31.3) | 19.6 / 25.0 (23.3 / 32.9)  |
| No. atoms                                                        | 7,169                     | 7,793                      |
| Protein atoms                                                    | 6,955                     | 7,609                      |
| Heterogen Atoms                                                  | 6                         | 92                         |
| Solvent Molecules                                                | 208                       | 92                         |
| Average B-factor (Å <sup>2</sup> )                               | 71.95                     | 63.5                       |
| Macromolecules                                                   | 72.4                      | 63.3                       |
| Ligands                                                          | -                         | 62.5                       |
| Solvent                                                          | 56.8                      | 50.9                       |
| R.m.s deviations                                                 |                           |                            |
| Bond lengths, Å                                                  | 0.01                      | 0.01                       |
| Bond angles, °                                                   | 1.14                      | 1.03                       |
| Ramachandran Plot (%)                                            |                           |                            |
| Favored                                                          | 94.2                      | 95.4                       |
| Allowed                                                          | 4.41                      | 3.9                        |
| Outliers                                                         | 1.36                      | 0.7                        |

<sup>a</sup> Highest resolution shell is shown in parentheses.

<sup>b</sup>  $R_{\text{merge}} = \sum |I_h - \langle I_h \rangle| / \sum I_h$  over all *h*, where *I*<sub>*h*</sub> is the intensity of reflection *h*.

<sup>c</sup>  $R_{\text{work}}$  and  $R_{\text{free}} = \sum ||F_o| - |F_c|| / \sum |F_o|$ , where *F*<sub>*o*</sub> and *F*<sub>*c*</sub> are observed and calculated amplitudes, respectively. *R*<sub>*free*</sub> was calculated using 5% of data excluded from the refinement.

**Supplementary Table 2. SAXS-derived radii of gyration ( $R_g$ ) and maximal end-to-end distances ( $D_{max}$ ) for SHP2<sup>WT</sup> and SHP2<sup>E76K</sup> proteins.**

| <b>Protein</b>       | <b>Guinier,<br/><math>R_g</math> (Å)</b> | <b>Reciprocal<br/>Space, <math>R_g</math> (Å)</b> | <b>Dmax<br/>(Å)</b> |
|----------------------|------------------------------------------|---------------------------------------------------|---------------------|
| SHP2 <sup>WT</sup>   | 26.2 ± 0.2                               | 26                                                | 83 ± 3              |
| SHP2 <sup>E76K</sup> | 29.2 ± 0.3                               | 29                                                | 100 ± 4             |

\*Errors represent represent standard deviations and were calculated using PRIMUS software.

**Supplementary Table 3. Relative activity of SHP2 enzyme variants and sensitivity to inhibition by SHP099 in the absence and presence of p-IRS1.**

| Protein               | Relative Basal Vmax (%) | SHP099 IC <sub>50</sub> , Basal (μM) | SHP099 IC <sub>50</sub> , 10 nM pIRS-1 (μM) | SHP099 IC <sub>50</sub> , 10 μM pIRS-1 (μM) | pIRS-1 AC <sub>50</sub> (nM) |
|-----------------------|-------------------------|--------------------------------------|---------------------------------------------|---------------------------------------------|------------------------------|
| SHP2 <sup>WT</sup>    | 3 ± 1                   | N.R.                                 | 0.11 ± 0.04                                 | 1.7 ± 0.13                                  | 247 ± 18                     |
| SHP2 <sup>F285S</sup> | 20 ± 3                  | 0.068 ± 0.004                        | 0.21 ± 0.05                                 | 7.08 ± 1.37                                 | 18 ± 2                       |
| SHP2 <sup>G60V</sup>  | 15 ± 4                  | 0.642 ± 0.058                        | 2.8 ± 0.1                                   | 30.2 ± 2.0                                  | 9 ± 2                        |
| SHP2 <sup>S502P</sup> | 51 ± 2                  | 0.519 ± 0.068                        | 2.6 ± 0.2                                   | 102 ± 5                                     | 5 ± 2                        |
| SHP2 <sup>D61V</sup>  | 55 ± 3                  | 0.777 ± 0.126                        | 16 ± 2                                      | >100                                        | 4 ± 1                        |
| SHP2 <sup>E76K</sup>  | 88 ± 7                  | 34 ± 6                               | > 50                                        | > 400                                       | N.R.                         |
| SHP2 <sup>PTP</sup>   | 100 ± 8                 | N.R.                                 | N.R.                                        | N.R.                                        | N.R.                         |

\*Errors represent represent standard error of the mean (SEM) and were calculated using GraphPad Prism.

**Supplementary Table 4. Sequences of SHP2 Primers Used in this Study.**

| <b>Primer</b>                        | <b>Sequence</b>                                |
|--------------------------------------|------------------------------------------------|
| SHP2_G60V_Forward                    | GATTCAGAACACTGTTGATTACTATGACCTGTATGGAGG        |
| SHP2_G60V_Reverse                    | CCTCCATACAGGTCATAGTAATCAACAGTGTCTGAATC         |
| SHP2_D61V_Forward                    | CAGAACACTGGTGTCTTACTATGACCTGTATGGAGGG          |
| SHP2_D61V_Reverse                    | CCCTCCATACAGGTCATAGTAAACACCAGTGTCTG            |
| SHP2_E76K_Forward                    | GCCACTTTGGCTAAGTTGGTCCAGTATTACATGG             |
| SHP2_E76K_Reverse                    | CCATGTAATACTGGACCAACTTAGCCAAAGTGGC             |
| SHP2_F285S_Forward                   | CATCCTGCCCTCTGATCATACCAGGGTTGTC                |
| SHP2_F285S_Reverse                   | GACAACCCTGGTATGATCAGAGGGCAGGATG                |
| SHP2_S502P_Forward                   | GGTCTCAGAGGCCAGGGATGGTCCAGAC                   |
| SHP2_FS502P_Reverse                  | GTCTGGACCATCCCTGGCCTCTGAGACC                   |
| SHP2_PTP_Forward (for amplification) | ACCTGTATTTTCAGGGATCCGGAGGACGTATAAATGCTGCTGAAAT |
| SHP2_PTP_Reverse (for amplification) | GCTTTGTTAGCAGCCGGATCCTTATAGTGTTCATATAATG       |
| PTPN11_Exon 3_CRISPR_Guide_Forward   | CACCGGATTACTATGACCTGTATGG                      |
| PTPN11_Exon 3_CRISPR_Guide_Reverse   | AAACCCATACAGGTCATAGTAATCC                      |
